# Supplementary material
Source: publisher figshare collection journal article supplement (https://tandf.figshare.com/ndownloader/files/21269574)
Supplement: Supplementary file 1 [file 21269574]

**FIGURE 3.** Heat map indicating the contribution of the different parameters (proximal composition, minerals, vitamins, TPC and antioxidant activity) for each sample (HP1, HP2, HP3) against the ideal cultivar obtained using GRA system. The weighted grey relational grade (WGRG) was obtained using the sum of minerals.

**Table 5.** Average valuesfor each parameter shown in the first column in the different harvest periods (HP1, HP2, HP3) comparing to the ideal cultivar obtained using Grey relational analysis (GRA).

| Parameter | HP1 | HP2 | HP3 | Perfect Value |
| --- | --- | --- | --- | --- |
| Moisture | 87.7 | 86.95 | 86.06 | 81.76 |
| Protein | 3.789 | 3.594 | 3.228 | 3.98 |
| TDF | 6.120 | 6.278 | 6.366 | 6.68 |
| Fat | 0.444 | 0.458 | 0.358 | 0.48 |
| TPC | 5.97 | 7.04 | 9.08 | 9.53 |
| FRAP | 0.519 | 0.57 | 0.617 | 0.65 |
| ABTS | 8.2 | 10.2 | 10.6 | 11.13 |
| DPPH | 5.26 | 7.2 | 7.36 | 7.73 |
| Vit C | 21.88 | 54.14 | 104.61 | 109.85 |
| EAAI | 27.71 | 25.02 | 19.68 | 29.09 |
| Na (mg/100g DW) | 69.1 | 24.6 | 34.7 | 72.59 |
| Ca | 1334.0 | 1407.4 | 1318.8 | 1477.74 |
| K | 3321.2 | 1963.8 | 3341.7 | 3508.83 |
| P | 153.33 | 142.4 | 137.7 | 160.99 |
| Fe | 19.87 | 13.9 | 11.1 | 20.87 |
| Zn | 3.32 | 3.28 | 3.2 | 3.49 |
| Cu | 1.49 | 1.35 | 1.52 | 1.59 |
| Mn | 9.94 | 6.3 | 7.4 | 10.44 |
| Mg | 513.1 | 458.2 | 455.0 | 538.77 |
| Se | 9.01 | 8.8 | 8.5 | 9.46 |
| B1 | 0.62 | 0.5 | 0.5 | 0.65 |
| B2 | 6.36 | 5.7 | 4.5 | 6.68 |
| B3 | 0.54 | 0.50 | 0.45 | 0.56 |
| E | 3.24 | 3.3 | 5.8 | 6.10 |
| As | 0.1218 | 0.0976 | 0.0841 | 0.0799 |

* Content was expressed in g/100 g fw.
